# Supplementary material
Source: MDPI journal article supplement (https://www.mdpi.com/2073-4344/8/7/273)
Supplement: s1 [file s1]

# Highly efficient electrocatalytic carboxylation of 1-phenylethyl chloride at Cu foam cathode

La-Xia Wu<sup>1#</sup>, Qi-Long Sun<sup>2#</sup>, Man-Ping Yang<sup>2</sup>, Ying-Guo Zhao<sup>1</sup>, Ye-Bin Guan<sup>1\*</sup>, Huan Wang<sup>2\*</sup>, Jia-Xing Lu<sup>2\*</sup>

## 1. Data of constant potential electrolysis

Table S1 Constant potential electrolysis on different cathode a

| Entry | Cathode  | Potential / V | Q / C | t / s | Yield b % |
|-------|----------|---------------|-------|-------|-----------|
| 1     | Cu flake | -1.18         | 70    | 14622 | 32        |
| 2     | Cu foam  | -1.18         | 70    | 11948 | 36        |

<sup>a</sup> Electrolysis were carried out in undivided cell, Mg rod counter electrode, Ag/AgI/0.1 mol L<sup>-1</sup> TBAI reference electrode, electrolyte solution: MeCN(10 mL)-TEAI(0.1 M)-substrate(0.05 M). <sup>b</sup> Mass yield based on **1a**, determined by HPLC.

## 2. Cyclic voltammograms curves versus the oxidation of ferrocene

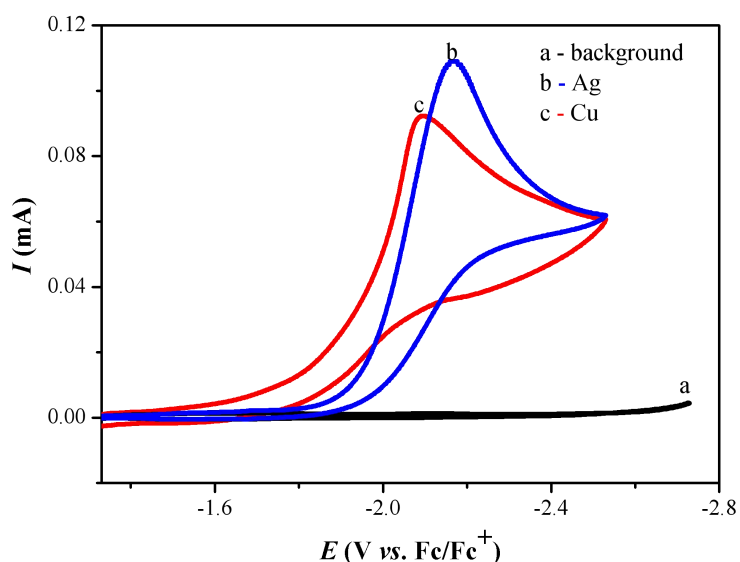

**Figure S1** Cyclic voltammograms of 4 mM 1-phenylethyl chloride recorded at different cathodes in 0.1 M TEABF<sub>4</sub>-MeCN solution at a sweep rate of 0.1 V s<sup>-1</sup> at 18 °C saturated with N<sub>2</sub> (a) background; (b) Ag disk; (c) Cu disk.
